# Supplementary material
Source: MDPI journal article supplement (https://www.mdpi.com/2071-1050/13/3/1565)
Supplement: s1 [file s1]

## Sheet: Sheet1
(a)
	(b)
	Figure S1. Ravenna PSC (Piano Strutturale Comunale) annex B.3.1 “Carta dei rischi di origine naturale” (Risks Maps of Natural Origin): (a) B.3.1.a “Carta dei rischi di origine naturale: subsidenza” (Risks Maps of Natural Origin: subsidence); (b) “Carta dei rischi di origine naturale : erosione” (Risks Maps of Natural Origin: erosion). Source: Ravenna Urban Plan-ning.
